# Supplementary material
Source: PubMed Central journal article supplement (PMC10440279)

## Supplemental figures

Sepsis induced endothelial dysfunction drives acute-on-chronic liver failure via Angiopoietin-2-HGF-C/EBP $\beta$  pathway

Elias et al

**Figure S1.** Mice (male and female) were treated with TAA (200mg/L in the drinking water) and subjected to cecal ligation and puncture (CLP) or sham surgery.

**A.** Mortality in mice at 24 and 48 hours. **B.** INR in the four groups of female mice

**Figure S2.** Mice (male and female) were treated with TAA (200mg/L in the drinking water) and subjected to cecal ligation and puncture (CLP) or sham surgery.

Representative images of H&E staining

**Figure S3.** Relative mRNA levels at 24 hours in four groups of mice \*, P<0.05, \*\*, P<0.01

**Figure S4** Ingenuity pathway analysis for each of the pairwise comparisons.

**Figure S5** Ingenuity pathway analysis for each of the pairwise comparisons.

**Figure S6.** Gene expression in ACLF and control cirrhosis (GSE139602). \*, P<0.05.

**Figure S7.** Western blot analysis of ANG-2 and HGF protein levels in human samples.

Figure S1

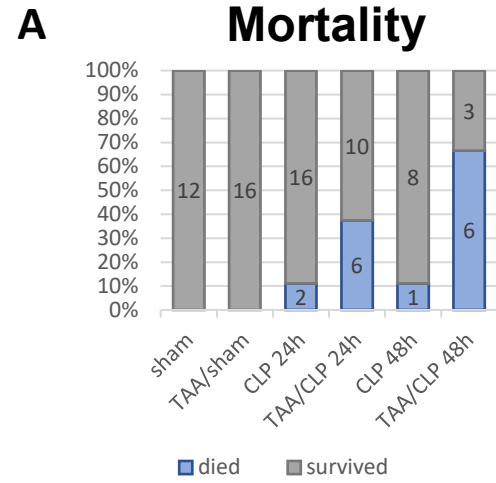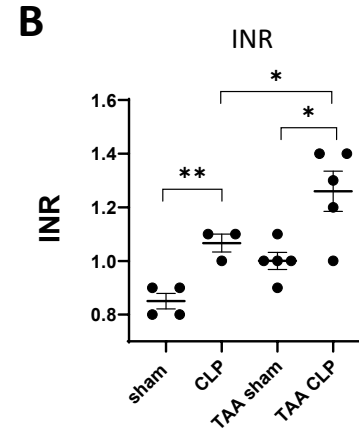

Figure S2

H&E

Control

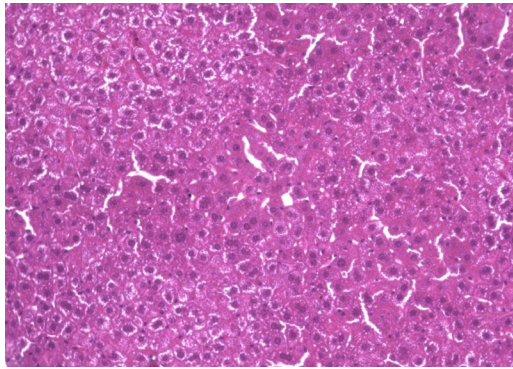

CLP

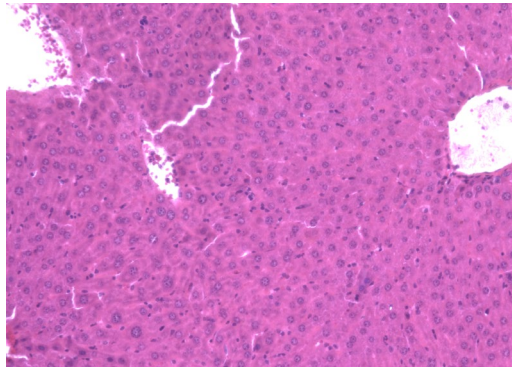

TAA

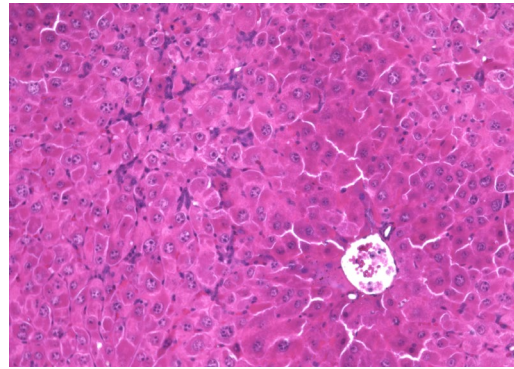

TAA CLP

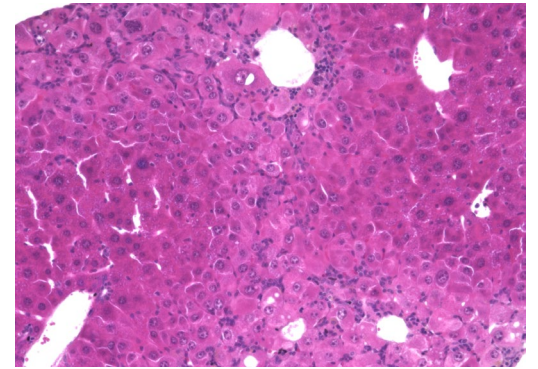

Figure S3

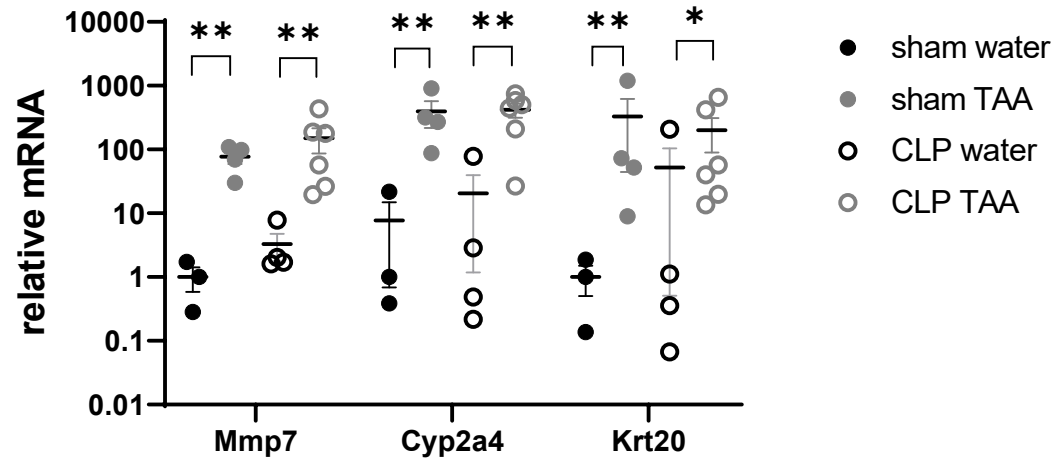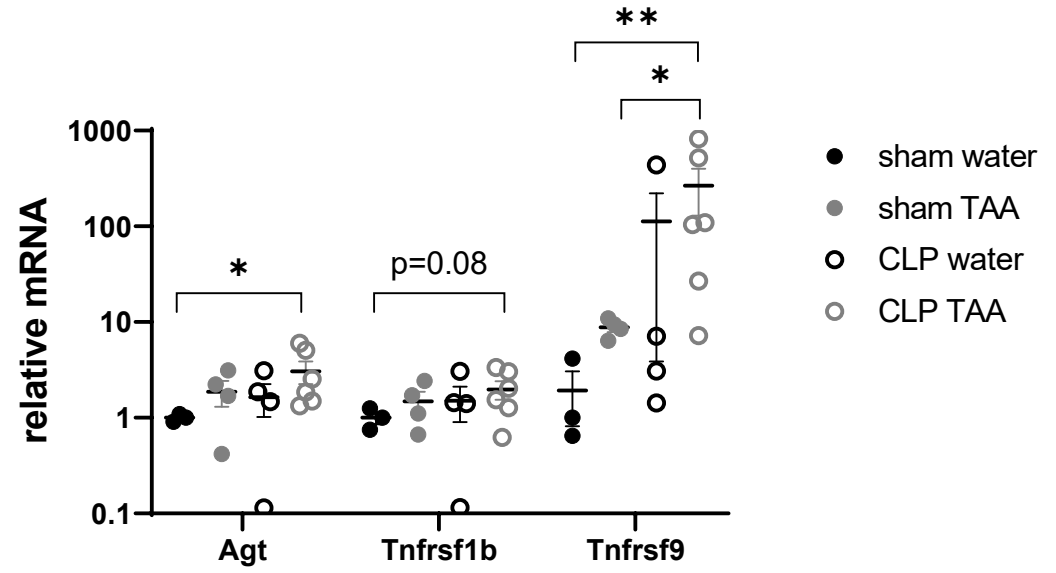

Figure S4

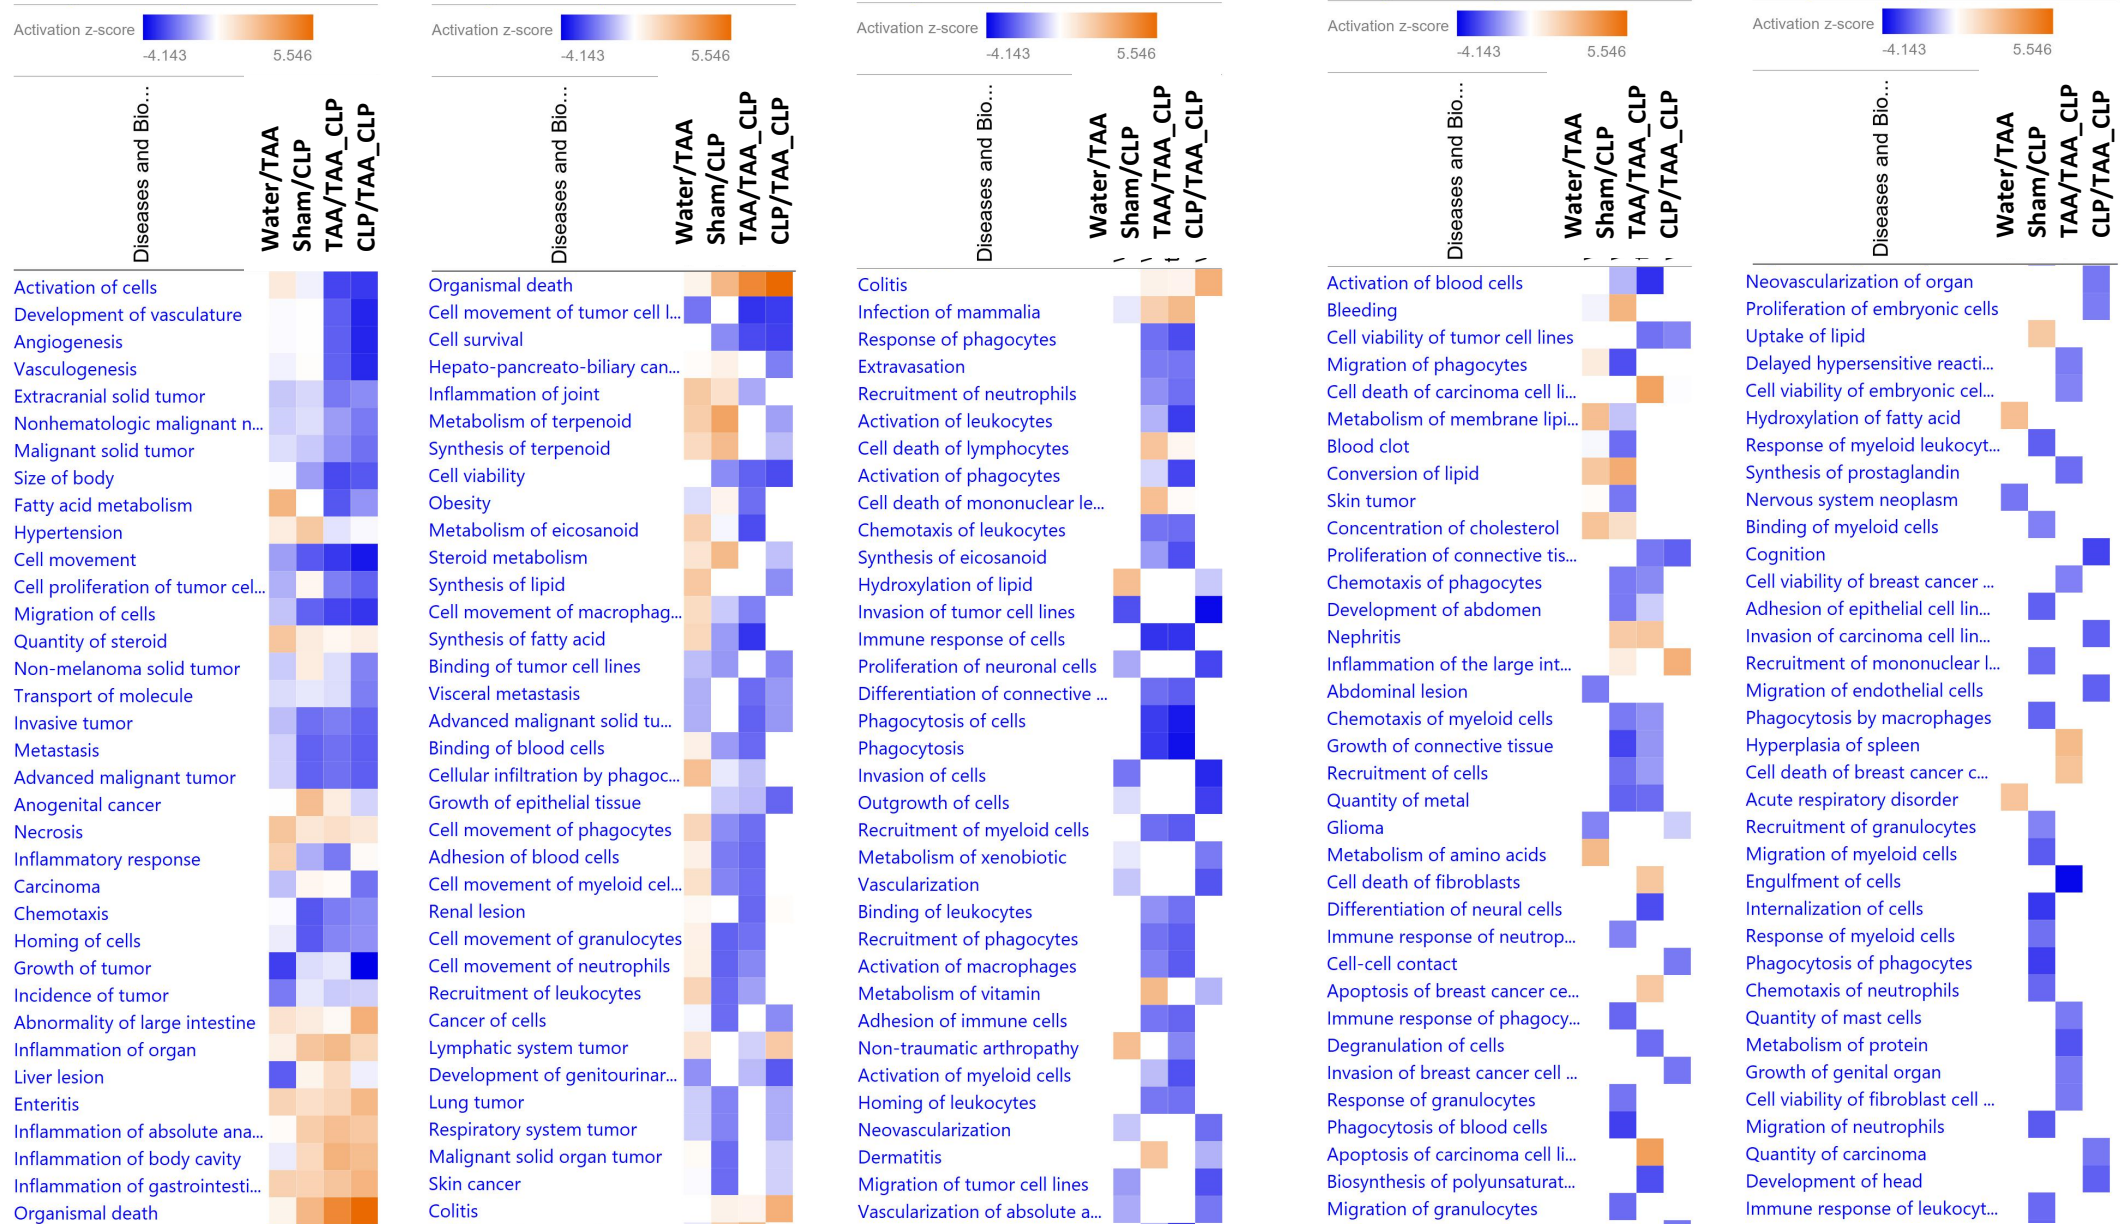

Figure S5

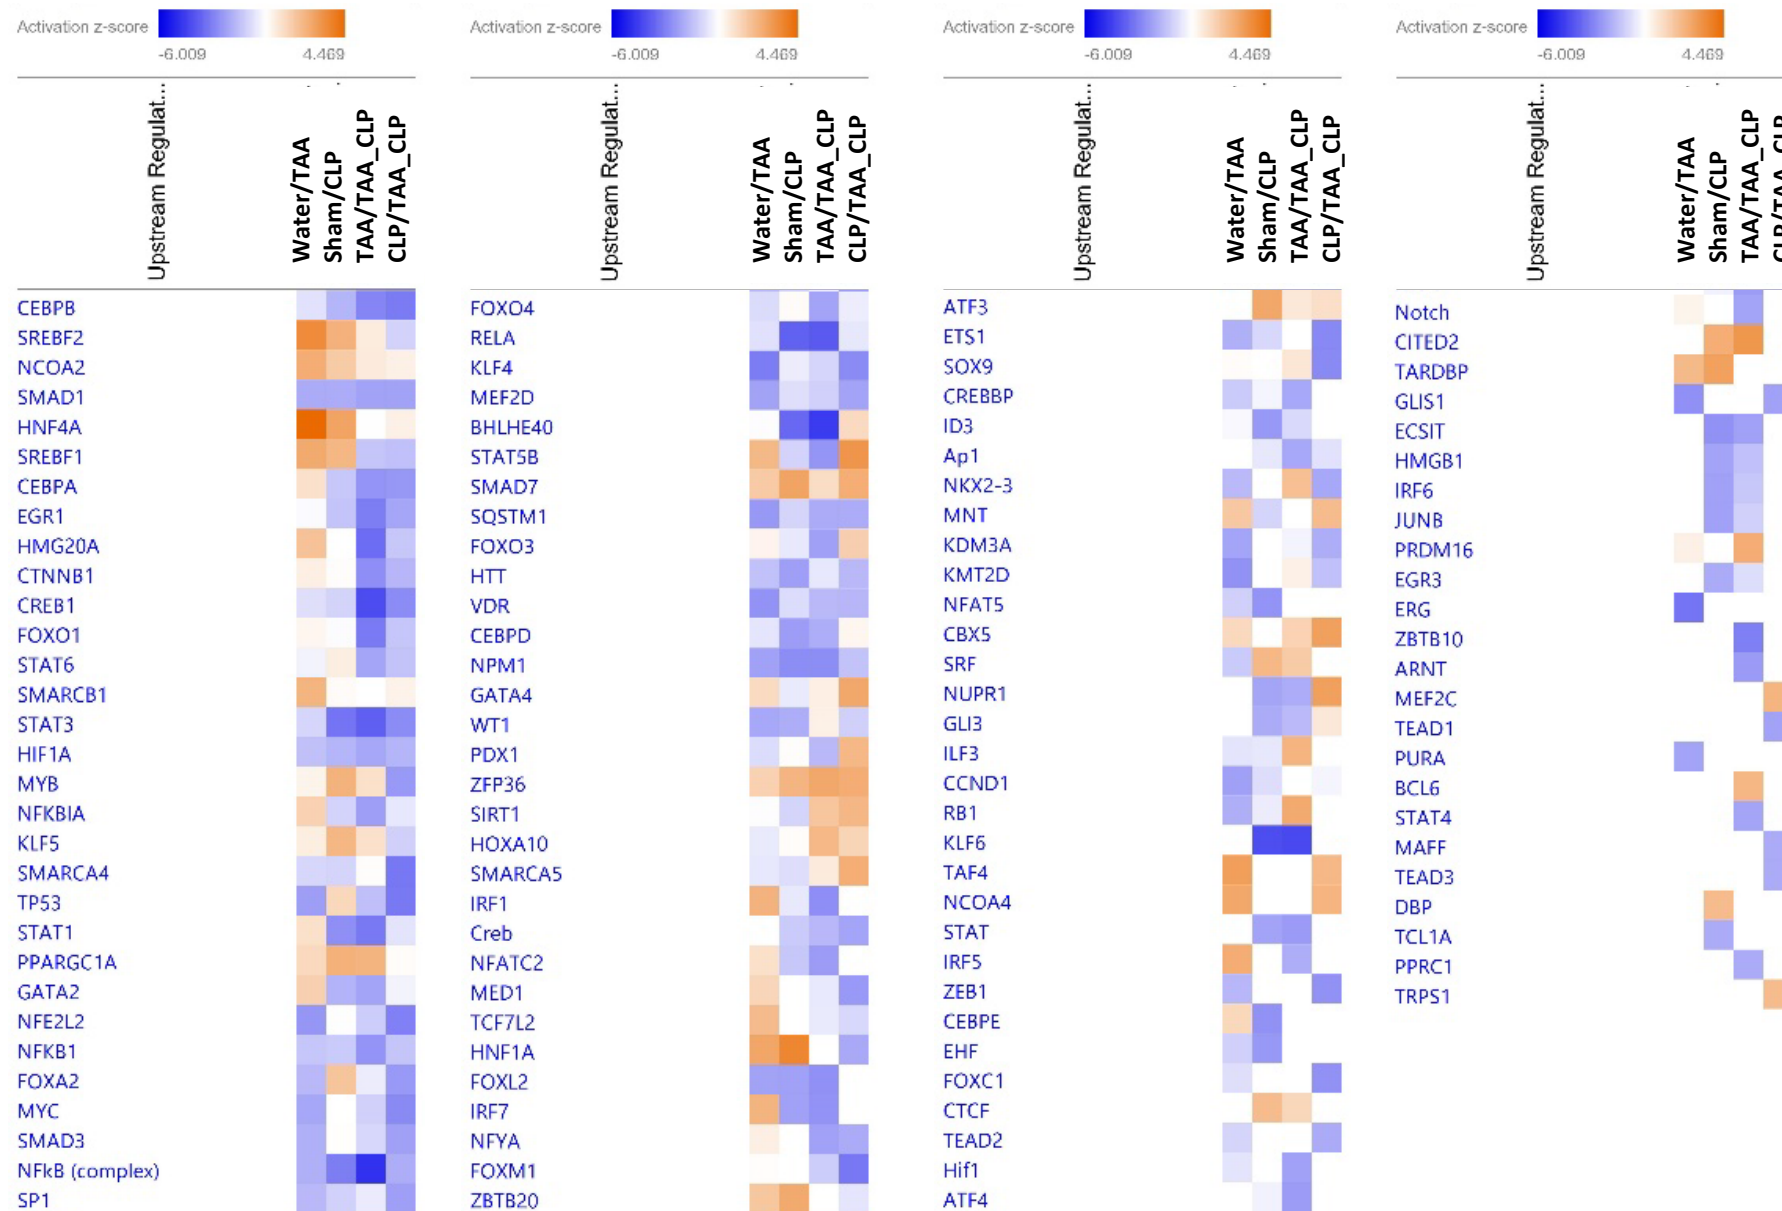

Figure S6

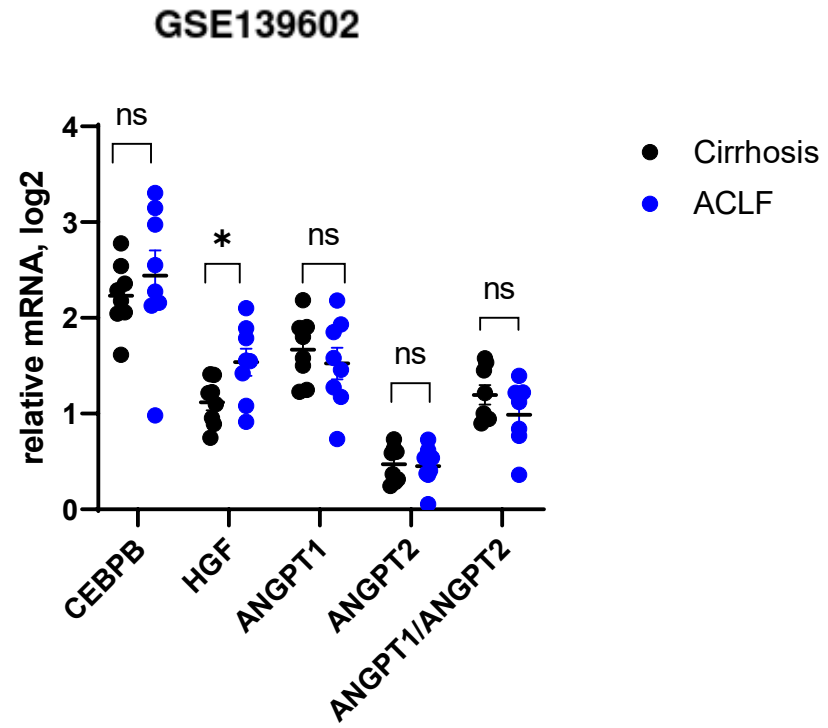

Figure S7

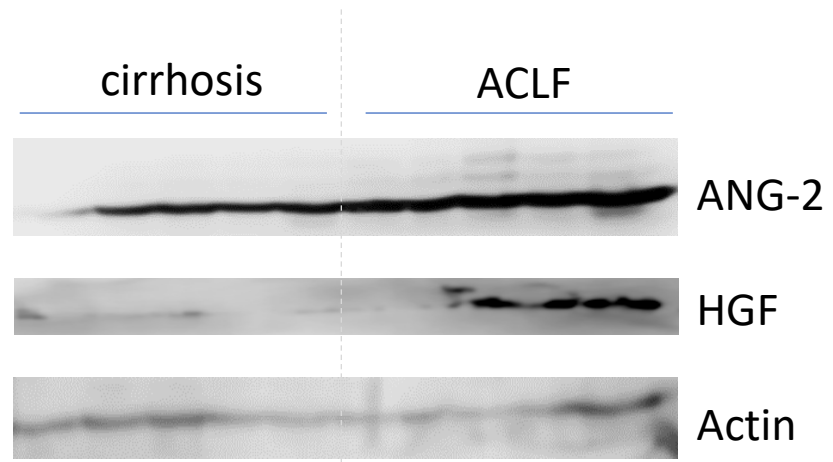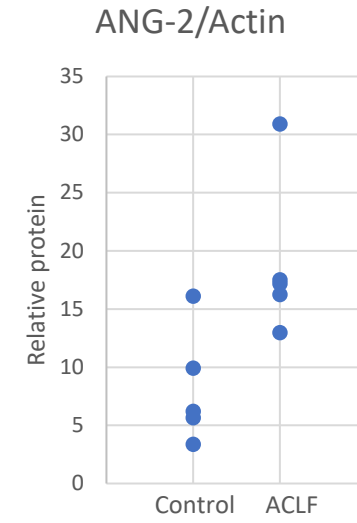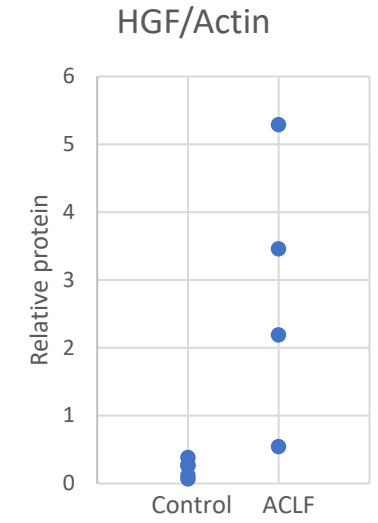

Supplement: NIHMS1877561-supplement-Supplemental_Digital_Content.pdf [file NIHMS1877561-supplement-Supplemental_Digital_Content.pdf]
